# Supplementary material for: Morphology of GPS and DPS-TEC Over an Equatorial Station: Validation of IRI and NeQuick 2 Models
Source: Copernicus journal article supplement (doi:10.5194/angeo-2018-57), 2018-06-08
Supplement: Supplementary file [file angeo-2018-57-RC2-supplement.pdf]

1 O.O. Odeyemi<sup>1</sup>, J.O Adeniyi<sup>2</sup>, O.A. Oladipo<sup>3</sup>, A.O. Olawepo<sup>3</sup>, I.A. Adimula<sup>3</sup>, E.O Oyeyemi<sup>1</sup>  
2 1 Department of Physics, University of Lagos, Nigeria olumidephysics@yahoo.com  
3 2 Department of Physical Sciences, Landmark University, Omu-Aran, Nigeria [adeniyi.jacob@lmu.ng.edu](mailto:adeniyi.jacob@lmu.ng.edu)  
4 3 Physics Department, University of Ilorin, Ilorin  
5

## 6 **Morphology of GPS and DPS-TEC Over an Equatorial Station:** 7 **Validation of IRI and NeQuick 2 Models.**

### 8 **0.0 Abstract**

9 We investigated total electron content (TEC) at Ilorin (8.50°N 4.65E, dip lat. 2.95) during  
10 a low solar activity 2010. The investigation involved the use of GPS derived TEC, ~~TEC~~  
11 estimated from digisonde portable sounder data (DPS-TEC), the International Reference  
12 Ionosphere model (IRI-TEC) and NeQuick 2 model (NeQ-TEC). **The five most quietest days of**  
13 **the months obtained from the international quiet days (IQD) from the website**  
14 **[http://www.ga.gov.au/oracle/geomag/iqd\\_form.jsp](http://www.ga.gov.au/oracle/geomag/iqd_form.jsp) were used for the investigation.** During the  
15 sunrise period, we found that the rate of increases in DPS-TEC, IRI-TEC and NeQ-TEC were  
16 higher with respect to GPS-TEC. One reason for this can be alluded to an overestimation of  
17 plasmaspheric electron content (PEC) contribution in modeled TEC and DPS-TEC. A correction  
18 factor around the sunrise where a significant percentage difference of overestimations between  
19 the modeled TEC and GPS-TEC was obtained will correct the differences. Our finding revealed  
20 that during the daytime when PEC contribution is known to be absent or insignificant, GPS-TEC  
21 and DPS-TEC in April, September and December predicts TEC very well. The lowest  
22 discrepancies were observed in May, June and July (June solstice) between the observed and all  
23 the model values in all hours. There is an overestimation in DPS-TEC that could be due to  
24 extrapolation error while integrating from the peak electron density of F2 (NmF2) to around ~  
25 1000 km in the Ne profile. The underestimation observed in NeQ-TEC must have come from the  
26 inadequate representation of contribution from PEC on the topside of NeQ model profile  
27 whereas the exaggeration of PEC contribution in IRI-TEC amount to overestimations of GPS-  
28 TEC. The excess bite-out observed in DPS-TEC and NeQ-TEC show the indication of  
29 overprediction of fountain effect in these models. Therefore, the daytime bite-out observed in  
30 these two models require a modifier that could moderate the perceived fountain effect  
31 morphology in the models accordingly. Seasonally, we found that all the TECs maximize and  
32 minimize during the March equinox and June solstice, respectively. Therefore, GPS-, DPS-, IRI-  
33 and NeQ-TEC reveal the semi-annual variations in TEC as reported in all regions. The daytime  
34 DPS-TEC performs better than the daytime IRI-TEC and NeQ-TEC in all the months, however,

35 the dusk period requires attention due to highest percentage difference recorded especially for  
36 DPS-TEC and the models in March, and November and December for DPS-TEC.

37

## 38 **1.0 Introduction**

39 Total electron content (TEC) is the total number of free electrons in a columnar of one  
40 square meter along the radio path from the ~~global positioning system (GPS)~~ satellite to the  
41 receiving station on the Earth. TEC exhibits diurnal, seasonal, solar cycle and geographical  
42 variations. Therefore, the physical and dynamical morphology of the TEC over a given location  
43 is of great importance in trans-ionospheric communications during undisturbed and disturbed  
44 geomagnetic conditions (Jesus et al., 2016; Tariku, 2015; and Akala et al., 2012). GPS-TEC is  
45 quantified from the GPS orbiting satellites to the GPS receiver station on the Earth, with an  
46 approximate distance of 20200 km (Liu et al., 1996b; Rama Rao et al., 2006a; Rama Rao et al.,  
47 2006b; Liu et al., 2006). Thus, a typical GPS-TEC measurement includes the complete  
48 plasmaspheric electron content (PEC).

49

50 The International Reference Ionosphere (IRI) is a standard model that is based on  
51 worldwide data from various measurements (Bilitza, 2001; Bilitza, 1999; Bilitza, 1986; Bilitza  
52 and Rawer, 1998; and Rawer et al., 1978 ). The Committee on Space Research (COSPAR) and  
53 the Union Radio-Scientifique Internationale (URSI) meet yearly to improve the IRI model. The  
54 IRI model provides reliable ionospheric densities, composition, temperatures, and composition  
55 (Bilitza, 2001). The Comite Consultatif International des Radiocommunications (CCIR) Model  
56 was developed by Rawer and Bilitza (1990) while the Union Radio Scientific International  
57 (URSI) developed URSI option of IRI model (Fox and McNamara, 1988; Rush et al., 1989). The  
58 latest version of IRI model can be found at all time on the web  
59 (<http://nssdc.gsfc.nasa.gov/space/model/ions/iri.html>) with improvements on earlier versions of  
60 the model from the working group scientists on the model. The International Telecommunication  
61 Union, Radio-communication Sector (ITU-R) has introduced and adopted NeQuick for TEC  
62 modeling. In the NeQuick 2, the position, time and solar flux or sunspot number over a given  
63 location are embedded in the NeQuick model code. The output of the NeQuick 2 program is the  
64 electron density along any ray-path while the corresponding TEC measurement is by numerical  
65 integration in space and time. The availability ionospheric parameters ~~as contribution~~ for global

66 ionospheric models are not sufficient over the Africa sector compared to the consistent input of  
67 the parameters from the Asia and America sectors. Therefore, the investigations of the  
68 ionospheric parameters over Africa are continuously required to improve the global ionospheric  
69 model. For example, Bagiya et al. (2009) studied TEC around equatorial-low latitude region at  
70 Rajkot ( $22.29^{\circ}$  N,  $70.74^{\circ}$  E, dip  $14.03^{\circ}$  N ) during low solar activity and showed that TEC  
71 revealed seasonal variation with maximum and minimum at March equinox and June solstice,  
72 respectively. Young et al. (1970) examined a night enhancement in TEC at equatorial station of  
73 Hawaii and reported that the nighttime enhancement in TEC showed seasonal and solar cycle  
74 dependences. Olwendo et al. (2012) investigated TEC in Kenyan and found a semi-annual  
75 variation with minimum and maximum TEC June solstice and March equinox, respectively.  
76 They further reported that the TEC had a noontime dip and day-to-day variability. Using  
77 Faraday rotational technique, Olatunji (1967) studied TEC variation over equatorial station at  
78 Ibadan and found no daytime bite-out and seasonal anomaly over the equatorial region. Adewale  
79 et al. (2012) investigated TEC at Uganda during low and high solar activities. They found that  
80 TEC was higher during high solar activity compared with the low solar activity. Karia and  
81 Pathak. (2011) investigated the TEC at Surat and showed that TEC maximizes and minimizes  
82 during the equinox and June solstice, respectively. Rastogi et al. (1975) investigated the diurnal  
83 variation of TEC using Faraday rotation over the magnetic equator. They found that the TEC at  
84 the topside was higher than the TEC at the bottomside during the nighttime, however during the  
85 daytime, equal distribution of TEC was found on the topside and the bottomside of electron  
86 density (Ne) profile.

87 The DPS-TEC is the combination of TEC from the bottomside and topside electron density  
88 (Ne). The topside DPS-TEC is an extrapolated TEC from the peak electron density of the F2  
89 region (NmF2) to around~ 1000 km (DPS-TEC) thus, the major PEC contribution from the  
90 greater altitudes is excluded from DPS-TEC measurement (Belehaki et al., 2004; Breed and  
91 Goodwin, 1997; and Reinisch and Huang, 2001). The combined investigation on GPS and DPS  
92 is scanty over Africa (Ciraolo and Spalla, 1997) due to lack of colocated GPS and DPS data in  
93 most of the equatorial stations. Therefore, the ionospheric modeling and the improvement on the  
94 existing models are important to understanding of the ionospheric structure of a given location in  
95 the absence of instrumentations.

96           Regarding the DPS-TEC measurement, Barbas et al. (2010) investigated GPS-TEC and  
97 DPS-TEC at Tucuman (26.69°S, 65.23°W) during different seasons and magnetic activities.  
98 They concluded that the DPS-TEC variation represented the GPS-TEC in all hour with minimal  
99 discrepancy. Reinisch et al.(2004) investigated GPS-TEC from satellite beacon signals and  
100 DPS-TEC from the DPS at mid-latitude and equatorial region. They found that GPS-TEC and  
101 DPS-TEC variations were similar. However, the daytime GPS-TEC profile values were higher  
102 than DPS-TEC profile values. Belehaki et al. (2004) extracted the plasmaspheric electron  
103 content (PEC) from the GPS-TEC at Athens (38°N, 23.5°E) over a year and found a maximum  
104 and minimum contribution of PEC in the morning and evening, respectively. Zhang et al. (2004)  
105 investigated the simultaneous variation of DPS-TEC and GPS-TEC over Hainan and reported  
106 that the daytime DPS-TEC and GPS-TEC variations are close, however during nighttime to pre-  
107 sunrise, a significant discrepancy between DPS-TEC and GPS-TEC was observed. Mosert and  
108 Altadill (2007), Jodogne et al. (2004) and Mckinnell et al. (1996) concluded that estimated  
109 PEC from the GPS-TEC and DPS-TEC is possible in colocated GPS and DPS station.

110  
111           Rios et al. (2007) investigated the DPS-TEC and IRI-TEC and found a smaller DPS-TEC  
112 compared to IRI TEC in all hour. McNamara (1985) observed discrepancies between DPS-TEC  
113 and IRI-TEC, he found that during the daytime, the IRI underestimated the observed DPS-TEC.  
114 Obrou et al. (2008) compared the DPS-TEC and IRI-TEC at Korhogo during high and low solar  
115 activity. They found that DPS-TEC and IRI-TEC values were close during high solar activity  
116 (HSA) and low solar activity (LSA). Nevertheless, the performance between the observed and  
117 model TEC was better in HSA compared to LSA. Adewale et al. (2012), Okoh et al. (2014), Jee  
118 and Scherliess (2005), Sulungu et al. (2017), and Migoya Orué et al. (2008) validated the IRI-  
119 TEC with GPS-TEC in different regions and found high discrepancies between the IRI and  
120 observed TEC. Furthermore, Arunpold et al. (2014) and Olwendo et al. (2012; 2013) also  
121 concluded that the signature of the geomagnetic storm was absent in the morphology of IRI.  
122 Thus IRI-TEC could not predict the effect of the geomagnetic storm on observed TEC.

123           Regarding the studies on NeQuick model, Cherniak and Zakharenkova (2016) validated  
124 NeQuick model and found that the topside ionosphere above ~ 500km in the NeQuick model  
125 consistently revealed underestimation due to inaccurate representation of topside Ne profile.  
126 Bidaine and Warnant (2011) validated NeQuick model with slant total electron content (STEC).

127 Rabiou et al. (2014) validated NeQuick model using the seasonal variation of TEC over equatorial  
128 station of Africa. They found that the upper boundary of the NeQuick models up to 20,000 km  
129 needs to be adjusted to accommodate the PEC-TEC in NeQuick model. Migoya-Orue et al.  
130 (2017) introduced B2bot in NeQuick and reported the improvement in the topside performance  
131 of the NeQuick model in the computation of TEC. Andreeva and Lokota (2013) found that the  
132 NeQuick reproduced the maximum values of electron density observed in the experiments.  
133 However, the electron density profiles reproduction from NeQuick show significant  
134 discrepancies in some periods. Leong et al. (2013) investigated TEC and NeQuick 2 models.  
135 They found that the observed TEC and NeQuick 2 TEC are close in values during post-noon and  
136 post-midnight. However, the post-sunset revealed some discrepancies. Yu et al. (2012)  
137 investigated the monthly average of NeQuick model over three stations in China (Changchun,  
138 Beijing, and Chongqing) during the quietest period. They found that NeQuick accurately  
139 predicted GPS-TEC. However, the NeQuick underestimated the observed TEC and NmF2 in  
140 few cases.

141  
142 The current contributions of Africa on the improvement of ionospheric models (IRI and  
143 NeQuick) are not adequate compared with the continuous support received from Asia and South  
144 America. The scanty of ionospheric instrumentations at the equatorial region of Africa has a  
145 considerable effect on the shortcoming. Therefore, the continuous validation of IRI and NeQuick  
146 models with the observed parameter is necessary for improved ionospheric model. Furthermore,  
147 the investigation on DPS-TEC has not been reported extensively for comparison purpose.  
148 Therefore, this paper set to investigate the combined relationship between the variations of GPS-  
149 TEC and DPS-TEC, and validations of IRI-TEC, and NeQ-TEC models with the observed  
150 parameters. Our finding will reveal the suitability of DPS-TEC, IRI-TEC and NeQ-TEC in place  
151 of GPS-TEC. The result will also reveal the appropriate model for the equatorial station in  
152 Africa. Thus, the changed TEC obtained from the combined relationship between GPS-TEC,  
153 DPS-TEC, IRI-TEC and NeQ-TEC could be used to improve the discrepancy in the model  
154 values.

155  
156 **2.0 Methods of Analysis of GPS and DPS Data**

157 The five most quiet days of GPS and DPS-TEC data for each month were presented and  
158 analyzed during the year 2010 with the local time (LT).

159

## 160 2.1 GPS-TEC

161 The Slant TEC records from GPS has errors due to satellite differential delay (satellite bias (bs))  
162 and receiver differential delay (receiver bias (br)) and receiver inter-channel bias (b<sub>SR</sub>). This  
163 uncorrected slant GPS-TEC measured at every one-minute interval from the GPS receiver  
164 derived from all the visible satellites at the Ilorin station are converted to vertical GPS-TEC  
165 using the relation below in equation (1).

$$166 \quad (\text{GPS} - \text{TEC})_V = (\text{GPS} - \text{TEC})_S - [b_S + b_R + b_{SR}]/S(E) \quad 1$$

167 Where  $(\text{GPS} - \text{TEC})_S$  is the uncorrected slant GPS-TEC measured by the receiver,  $S(E)$  is the  
168 obliquity factor with zenith angle ( $z$ ) at the Ionospheric Pierce Point (IPP),  $E$  is the elevation  
169 angle of the satellites in degrees and  $(\text{GPS} - \text{TEC})_V$  is the vertical GPS-TEC at the IPP. The  
170  $S(E)$  is given as

171

$$172 \quad S(E) = \frac{1}{\cos(z)} = \left[ 1 - \left( \frac{R_E \times \cos(z)}{R_E + h_s} \right)^2 \right]^{-1/2} \quad 2$$

173 Where  $R_E$  is the mean radius of the Earth measured in kilometer (km), and  $h_s$  is the height of the  
174 ionosphere from the surface of the Earth, which is approximately equal to 400 km according to  
175 Langley et al. (2002) and Mannucci et al. (1993). The ten most quiet slant GPS-TEC data for  
176 each month in the year 2010 were analyzed using Krishna software. This software reads raw data  
177 and corrects all source of errors mentioned above from Global Navigation Satellite System  
178 service (IGS) code file. A minimum elevation angle of 20 degrees is used to avoid multipath  
179 errors. The estimated vertical GPS-TEC data is subjected to a two sigma ( $2\sigma$ ) iteration. This  
180 sigma is a measure of GPS point positioning accuracy. The average one-minute VTEC data were  
181 converted to hourly averages.

182

## 183 2.2 DPS-TEC

184 Regarding the total electron content (TEC) from the digisonde portable sounder (DPS),  
185 the Standard Archive Output (SAO) files obtained from the ~~recorded of ionogram from the~~  
186 ~~installed~~ DPS at the University Ilorin were edited to remove magnetically disturbed days. Huang

187 and Reinisch (2001) technique was used to compute the DPS-TEC. The complete vertical DPS-  
188 TEC computation is obtained by applying the integration over the vertical electron density  
189 (Ne(h)) profile as shown in the equation below.

$$190 \text{ TEC} = \int_0^{h_{mF2}} \text{Ne}_B(dh) + \int_{h_{mF2}}^{\infty} \text{Ne}_T(dh) \quad 3$$

191 Where  $\text{Ne}_B$  and  $\text{Ne}_T$  are the bottomside and topside Ne profiles, respectively. The  $\text{Ne}_B$  is  
192 computed from the recorded ionograms by using the inversion technique developed by Huang  
193 and Reinisch (1996). It is known that the information above the peak of the F2 layer is absent  
194 from the record of the ionogram. Thus the  $\text{Ne}_T$  is computed by approximating the exponential  
195 functions with suitable scale height (Bent et al., 1972) with less estimated error of 5%. The  
196 ionograms are manually scaled and inverted into electron density profile using the NHPC  
197 software and later processed with the SAO explorer software based on the technique described  
198 above to obtain the TEC (Reinisch et al., 2005). An average of TEC for each hour is computed  
199 over the selected days. The universal time (UT) is the time convention for these analyses (GPS  
200 and DPS data). Local time (LT) was used in this study. Thus, 0100 UT (Universal time) is the  
201 same as 0200 LT (Local Time) in Nigeria. In this study, the seasonal variation was arranged into  
202 four seasons, as, March equinox or MEQU (March, and April), June solstice or JSOL (June, and  
203 July), SEQU (September, and October) and December solstice or DSOL (November, December).  
204 Due to technical reasons, there were data gaps in all days during January and February in the  
205 DPS measurements, therefore, we decided to neglect data in January and February in GPS-, IRI-,  
206 and NeQuick measurements for comparison purposes thus, two simultaneous representative  
207 months were used to infer each season. The average of the monthly median of the five quietest  
208 days for the representative months is found to give each parameter a particular season discussed  
209 above.

210

### 211 **2.3 Validation of IRI - 2016 and NeQuick Models**

212 The observed TEC and NmF2 were compared with the IRI-2016 model. The website  
213 [http://www.ccmc.gsfc.nasa.gov/modelweb/models/iri\\_vitmo.php](http://www.ccmc.gsfc.nasa.gov/modelweb/models/iri_vitmo.php) provides the modeled TEC  
214 values. The upper boundary height 2000 km was used, and the B0 table option was selected for  
215 the bottomside shape parameter. The equations 3a, 3b and 3c represent the difference between  
216 GPS-TEC and DPS-TEC, GPS-TEC and IRI-TEC and GPS-TEC and NeQ-TEC while equations

217 4a, 4b, and 4c below show the percentage change between GPS-TEC and DPS-TEC, GPS-TEC  
 218 and IRI-TEC, and GPS-TEC and NeQ-TEC.

219

220  $\Delta_{\text{GPS}/\text{DPS}} = \text{DPS}_{\text{TEC}} - \text{GPS}_{\text{TEC}}$  3a

221  $\Delta_{\text{GPS}/\text{IRI}} = \text{IRI}_{\text{TEC}} - \text{GPS}_{\text{TEC}}$  3b

222  $\Delta_{\text{GPS}/\text{NeQ}} = \text{NeQ}_{\text{TEC}} - \text{GPS}_{\text{TEC}}$  3c

223  $\%(\Delta_{\text{GPS}/\text{DPS}}) = \frac{\text{DPS}_{\text{TEC}} - \text{GPS}_{\text{TEC}}}{\text{DPS}_{\text{TEC}}} \times 100$  4a

224  $\%(\Delta_{\text{GPS}/\text{IRI}}) = \frac{\text{IRI}_{\text{TEC}} - \text{GPS}_{\text{TEC}}}{\text{DPS}_{\text{TEC}}} \times 100$  4b

225  $\%(\Delta_{\text{GPS}/\text{NeQ}}) = \frac{\text{NeQ}_{\text{TEC}} - \text{GPS}_{\text{TEC}}}{\text{DPS}_{\text{TEC}}} \times 100$  4c

226  $\Delta_{\text{GPS}/\text{DPS}}$ , represents the change between GPSTEC and DPS-TEC

227  $\Delta_{\text{GPS}/\text{IRI}}$ , represents the change between GPS-TEC and IRI-TEC

228  $\Delta_{\text{GPS}/\text{NeQ}}$  represents the change between GPS-TEC and NeQ-TEC

229  $\%(\Delta_{\text{GPS}/\text{DPS}})$ , represents the percentage deviation between GPS-TEC, and DPS-TEC  
 230 respectively.

231  $\%(\Delta_{\text{GPS}/\text{IRI}})$ , represents the percentage deviation between GPS-TEC, and IRI-TEC respectively.

232  $\%(\Delta_{\text{GPS}/\text{NeQ}})$ , represents the percentage deviation between GPS-TEC, and NeQ-TEC  
 233 respectively.

234

235 The Abdus Salam International Centre for Theoretical Physics (ICTP) - Trieste, Italy  
 236 with the collaboration of the Institute for Geophysics, Astrophysics and Meteorology (IGAM) of  
 237 the University of Graz, Austria developed the web front-end of NeQuick. This quick-run  
 238 ionospheric electron density model developed at the Aeronomy and Radiopropagation  
 239 Laboratory modeled TEC along any ground-to-satellite straight line ray-path. Therefore, the  
 240 observed TEC use for the validation of the NeQuick 2 was obtained in the address below  
 241 <https://t-ict4d.ictp.it/nequick2/nequick-2-web-model>.

242

## 243 3.0 Result

### 244 3.1 Monthly Median Variations



245 Figure 1 shows the plots of diurnal variations of the monthly median of GPS-, DPS-, IRI-  
246 , and NeQ- TEC during quiet period. The GPS-TEC is plotted in black line with the star symbol;  
247 the DPS-TEC is in green with the diamond symbol, IRI-TEC is in red line with zero symbols,  
248 and finally, the NeQ-TEC is in blue line with multiplication symbol. All TEC plots are regulated  
249 by the same local time (LT) on the horizontal axis. We found that the variations of GPS-, DPS-,  
250 IRI, and NeQ-TEC increase gradually from the sunrise period and reach the daytime maximum,  
251 then later decay till it gets to a minimum around 0500 or 0600 LT. These results show that the  
252 models capture the well known solar zenith angle dependence of TEC. Regarding the GPS-TEC,  
253 the pre-sunrise minimum is ranged between  $\sim 0.43$  TECU (June) to  $\sim 2.35$  TECU (April ) and the  
254 sunrise minimum of  $\sim 1.76$  TECU,  $\sim 2.58$  TECU, and  $\sim 2.58$  TECU are observed in March,  
255 November, and December respectively. The daytime maximum ranged between  $\sim 20$  TECU  
256 (June) -  $\sim 35.4$  TECU (November) and occurred around 1500 - 1700 LT. The dusk time decay  
257 in GPS-TEC is faster in June and slower in November around 2400 LT. Regarding DPS-TEC,  
258 the pre-sunrise minimum of DPS-TEC ranged between  $\sim 0.66$  TECU (August) -  $\sim 4.59$  TECU  
259 (May) around 0500 LT, while the daytime maximum is found around 1000 - 1600 LT and  
260 ranged between  $\sim 24.2$  TECU (July) -  $\sim 38.0$  TECU (March). A moderate daytime bite-out in  
261 DPS-TEC was observed in March, May, August, September, October, November and December.  
262 The duration of the bite-out was longer in October (1000 -1600 LT). The decay of DPS-TEC is  
263 faster in June and lower in April. Regarding the IRI-TEC, the pre-sunrise minimum in IRI-TEC  
264 ranged between  $\sim 2.3$  TECU (March) -  $\sim 4.1$  TECU (October and November) and found around  
265 0500 LT. The daytime maximum is seen around 1500 LT and 1600 LT and ranged between  $\sim$   
266  $21.9$  TECU (July) -  $\sim 31.7$  TECU (November). A moderate bite-out is present in all months  
267 between 1100 - 1600LT. As regard NeQ-TEC, the pre-sunrise minimum ranged between  $\sim 1.31$   
268 TECU (July) -  $\sim 2.88$  TECU (December) and found around 0500 LT. The daytime maximum  
269 around 1000 LT and 1600 LT, ranged between  $\sim 17.75$  TECU (July) -  $\sim 25.45$  TECU  
270 (November). A moderate noon time bite-out is seen in May, June, July, and August within a  
271 short time range. The decay in NeQ-TEC is faster in July and slower in November.  
272 Our investigation reveals that GPS, DPS, IRI and NeQ-TEC decay is faster and slower in June  
273 and December seasons, respectively. The maximum daytime is found in the DPS-TEC, whereas  
274 the minimum daytime is observed in NeQ-TEC. The DPS-TEC show a higher pre-sunrise

275 minimum of  $\sim 4.59$  TECU (May) while the GPS-TEC revealed a smaller pre-sunrise minimum  
276 of  $\sim 0.43$  TECU (June).

277

### 278 **3.2 Percentage deviation of DPS-TEC**

279 Figures 2a, and 2b show hourly variations of the changed TEC, and mass plot of hourly  
280 variations of % changed TEC between GPS-TEC and DPS-TEC from March to December  
281 during quiet period. Between 0100 - 0500 LT (Figure 2a), DPS-TEC constantly lower than the  
282 GPS-TEC in March, April, August, September, November, and December except in June and  
283 July and the changes range between  $\sim -4.67$  TECU (November) -  $\sim -0.53$  TECU (August). In  
284 Figure 2b, DPS-TEC uniformly overestimated GPS-TEC around 0700 - 1500 LT in all month  
285 except in June (0700 LT), November (1500 LT), August and December (1400 - 1500 LT) where  
286 DPS-TEC underestimated GPS-TEC. The percentage of overestimation ranges between  $\sim 2\%$   
287 (November) -  $\sim 49\%$  (March). We also observed that the DPS-TEC underestimated GPS-TEC  
288 between 1700 - 2400 LT in all months and ranged between  $\sim -0.15\%$  (October) -  $\sim -306\%$   
289 (November). A few cases of overestimation are noticed in March, May and September around  
290 local time (1700 LT). We also notice a consistent overestimation of DPS-TEC around 0100 LT  
291 and 0400 LT in June and July while underestimation occurred in March, April, August,  
292 September, October, November and December within the same period.

293

### 294 **3.2 Percentage deviation of IRI-TEC**

295 Figures 3a, and 3b, give hourly variations of the changed TEC, and mass plots of hourly  
296 variations of % changed TEC between GPS-TEC and IRI-TEC from March to December. The  
297 change between IRI-TEC and GPS-TEC occurred between 0100 - 1200 LT in all months except  
298 in March and April and the changed TEC ranged between  $\sim 0.01$  TECU (November) to  $\sim 15$   
299 TECU (October). The IRI-TEC continually overestimated GPS-TEC around 0100 - 1200 LT in  
300 all months however, underestimation occurred in March (0100 - 0500 LT), April (1200 LT),  
301 September and November (0300 - 0400 LT). The overestimation percentage ranges between  $\sim$   
302  $0.1\%$  (December) -  $\sim 86\%$  (June) between 0100 - 1200 LT. We also observed that in May and  
303 June, IRI-TEC overestimated GPS-TEC during May and June in all hours between  $\sim 2\%$  (1900  
304 LT) and  $\sim 86\%$  (0500 LT), respectively. Between 1300 - 2400 LT, we observed some irregular

305 patterns of underestimation and overestimation of DPS-TEC over GPS-TEC in most of the  
306 months.

307

### 308 **3.4 Percentage deviation of NeQ-TEC**

309 Figures 4a, and 4b, reveal the hourly variations of the changed TEC, and mass plots of  
310 hourly variation of % changed TEC between GPS-TEC and NeQ-TEC from March to December  
311 during quiet period. The increase change between NeQ-TEC and GPS-TEC are found 0100 -  
312 0900 LT except in November and December. We also found that, NeQ-TEC constantly  
313 overestimated GPS-TEC around 0100 - 0900 LT in all month except in March, April, August,  
314 September and November around 0400 LT and also around 0500 LT in March, April and  
315 November. The overestimation percentage is ranged between ~ 0.02% (April) - ~ 81% (July).  
316 We also observed that the NeQ-TEC underestimated GPS-TEC between 1200 - 1900 LT in all  
317 months and ranged between ~ - 0.3% (October) - ~ - 75% (November). In July, we noticed a  
318 consistent overestimation of NeQ-TEC in all hours except around 1300 LT (~ - 1.5% ) and 1400  
319 LT (~ - 0.6%) . Between 2000 - 2400 LT, NeQ-TEC overestimated GPS-TEC in March, April,  
320 June, September, October and December whereas in May, July, August and November, NeQ-  
321 TEC underestimated GPS-TEC.

322

### 323 **3.5 Comparisons of the deviations from GPS-TEC**

324 From Figure 2b, 3b, and 4b, we constantly found high percentage of underestimations of DPS-  
325 TEC, IRI-TEC and NeQ-TEC with respect to GPS-TEC between 0400 - 0600 LT in March and  
326 December. Around 0100 - 0500 LT, highest DPS-TEC percentage of underestimation are ~  
327 190%, ~ 210% - ~ 280% in March, November, and December respectively, highest IRI-TEC  
328 percentage of underestimation of IRI-TEC is ~ 200% in March, and highest NeQ-TEC  
329 overestimations is ~ 68% and ~75% in June and July, respectively and highest underestimation  
330 is ~ 60% in March. Between 0700 LT - 1800 LT, DPS-TEC overestimation and underestimation  
331 ranges between ~ 10% - ~ 10% in all months, IRI-TEC overestimation and underestimation  
332 ranges between ~ 70 - ~ 50% in all months, and NeQ-TEC overestimation and underestimation  
333 of ranges between ~ 80% - ~ 80% in all months. During 1900 - 2400 LT, DPS-TEC highest  
334 underestimation is ~ 310% in March, IRI-TEC overestimation and underestimation are found  
335 between the range of ~ 50% - ~ 50% in all months, and NeQ-TEC overestimation and

336 underestimation ranges between  $\sim 70\%$  -  $\sim 70\%$  in all months. Figure 5 reveals the seasonal  
337 variations of GPS-TEC, DPS-TEC, IRI-TEC, and NeQ-TEC during quiet period. We observed  
338 that both DPS-TEC and models reproduce the semi-annual variation with maximum and  
339 minimum TEC at March equinox and June solstice, respectively. The daytime maximum is  
340 ranged between  $\sim 24.8$  TECU (NeQ) -  $\sim 34$  TECU (DPS),  $\sim 19.2$  TECU (NeQ) -  $\sim 22.6$  TECU  
341 (DPS),  $\sim 24.9$  TECU (NeQ) -  $\sim 33.5$  TECU (DPS) and  $\sim 24.55$  TECU (NeQ) -  $\sim 31$  TECU  
342 (DPS), in March equinox, June solstice, September equinox, and December solstice,  
343 respectively.

344

#### 345 **4.0 Discussion of Result**

346 An investigation into the variations of GPS-TEC, DPS-TEC, IRI-TEC, and NeQ-TEC at  
347 an equatorial station ( $8.5^{\circ}\text{N } 4.65^{\circ}\text{E}$ ) in Africa during low solar activity in the year 2010 has been  
348 carried out. The TEC increases gradually from the sunrise period, then slowly reached the  
349 daytime maximum, and later decay till the pre-sunrise minimum. This result indicates that the  
350 TEC is a solar zenith angle dependence revealing maximum and minimum in TEC during the  
351 noontime and pre-sunrise or sunrise minimum, respectively (Wu et al.2008; Aravindan and Iyer  
352 1990; and Kumar and Singh 2009). Interestingly, the faster increase in the DPS-TEC than GPS-  
353 TEC during pre-sunrise is not consistent with the findings of Ezquer et al. (1992) at Tucumán  
354 ( $26.9^{\circ}\text{S}; 65.4^{\circ}\text{W}$ ), Belehaki et al. (2004) at Athens in the middle latitude, McNamara (1985) at  
355 low latitude and Obrou et al. (2008) at Korhogo ( $9.33^{\circ}\text{N}, 5.43^{\circ}\text{W}$ , Dip =  $0.67^{\circ}\text{S}$ ) and found  
356 smaller DPS-TEC compared with GPS-TEC. The evidence of PEC on GPS-TEC was recently  
357 reported by Belehaki et al. (2004). They extracted the plasmaspheric electron content (PEC)  
358 from the GPS-TEC and found a significant PEC in the morning and evening. Also, Jodogne et al.  
359 (2004), Mosert and Altadill (2007), and Mckinnell et al. (1996) obtained a rough estimation of  
360 PEC from the GPS and DPS-TEC. They concluded that the combined GPS-TEC and DPS-TEC  
361 could give the PEC of a given location. Therefore, a larger DPS-TEC during the sunrise could be  
362 attributed to inaccurate representation of PEC in the topside DPS-TEC profile during  
363 extrapolation from the peak of NmF2 to around  $\sim 1000$  km of Ne profile . Thus, a typical GPS-  
364 TEC naturally includes the PEC measurement ( Belehaki et al. 2003; Balan and Iyer, 1983;  
365 Carlson, 1996; and Breed and Goodwin, 1997).

366

367 Furthermore, our observation in GPS-TEC shows no conspicuous noontime bite-out. The  
368 bite-out is attributed to the occurrence of the most active fountain effect during the noontime at  
369 the magnetic equator due to the lifting of ionospheric plasma. Thus, the bite-out result from the  
370 interaction of eastward electric field and earth horizontal magnetic field. The interactions  
371 resulted to the lifting of plasma at the magnetic equator and diffused along geomagnetic field  
372 lines into the high latitudes, so leaving the reduced TEC at the magnetic equator  
373 (Bandyopadhyay, 1970; Olwendo et al., 2012; Skinner et al., 1966; Bolaji et al., 2012).  
374 However, the absence of daytime bite-out (Olatunji, 1967) in GPS-TEC found in our result  
375 shows that the productions of the bottomside and topside electron content are enhanced quickly  
376 to replenish the loss of the ionization that occurs during the noontime through the fountain effect.  
377 The higher DPS-TEC compared with IRI-TEC around sunrise is not consistent with Rios et al.  
378 (2007) who investigated comparison of DPS-TEC and IRI-TEC and found that DPS-TEC is  
379 smaller than IRI TEC in all hour. They concluded that the prediction of IRI-TEC included the  
380 high topside Ne profile. Thus, our observation suggests that the IRI-TEC has included low  
381 topside Ne profile in the model or excessive exaggeration of PEC in the topside Ne profile in the  
382 DPS-TEC. Our investigation shows that the daytime GPS-TEC and DPS-TEC in April, August  
383 and December appear to be approximately equal. This finding suggests that the topside Ne  
384 profile in DPS-TEC are moderately captured in the topside Ne profile in GPS-TEC. This finding,  
385 thus indicates the absence of PEC profile in DPS-TEC approximately reproduced the daytime  
386 GPS-TEC and IRI-TEC ( April, August and December). The insignificance of daytime PEC in  
387 the observation is inferred from the report of Rastogi et al. (1975) who measured TEC from  
388 Faraday rotations from ground receiver to ~ 20200 km. They found that the PEC contribution on  
389 the topside and the bottomside Ne profile is insignificant during the daytime. Moreover,  
390 Belehaki et al. (2004) investigation has recently reported the negligible PEC contributions during  
391 the daytime.

392  
393 Our higher daytime DPS-TEC compared with daytime IRI-TEC is consistent with  
394 McNamara (1985) who reported higher DPSTEC compared with IRI-TEC during the daytime.  
395 However, in the report of Obrou et al. (2008) at the equatorial station, the IRI-TEC was higher  
396 than the DPS-TEC at the low solar activity. We found a reduced daytime IRI and NeQ-TEC  
397 compared with GPS-TEC that indicates the excessive PEC removal from the model values that

398 its PEC contribution had been initially exaggerated during the sunrise. Our finding is supported  
399 by Migoya-Orue et al. (2017), Zakharenkova (2016), Rabiou et al., (2014), Nava and Radicella  
400 (2009), and Zh et al. (2014). They concluded that the topside ionosphere in the NeQuick model  
401 consistently revealed underestimation of observed TEC. The daytime IRI-TEC (April, July,  
402 August, and September ) and NeQ-TEC (June) is approximately reproduced in the GPS-TEC;  
403 this implies that the model factors in IRI and NeQ perform best in the absence of significant  
404 PEC contribution.

405 The hourly variations of percentage difference between GPS-TEC and DPS-TEC, GPS-  
406 TEC and IRI-TEC and GPS-TEC and NeQ-TEC in all months revealed that the pre-sunrise  
407 values in DPS-TEC, IRI-TEC and NeQ-TEC require an attention due to high percentage  
408 difference recorded in all variations especially in March for DPS-TEC and the models, and  
409 November and December for DPS-TEC. The daytime DPS-TEC value is closer to the GPS-TEC  
410 value compared to the daytime IRI-TEC and NeQ-TEC values. The nighttime NeQ-TEC and  
411 IRI-TEC perform better with GPS-TEC compared with DPS-TEC in all months, however more  
412 improvement is also required to minimize the effect of the discrepancies observed during the  
413 night. More work needs to be done during the pre-sunrise in all models especially in March for  
414 all models, and November and December for DPS-TEC.

415  
416 Seasonally, we discovered that TEC is maximum and minimum during the equinoxes and  
417 the solstices, respectively. Our report is consistent with Mala et al. (2009), Wu et al. (2008),  
418 Kumar and Singh (2009), and Balan and Rao, (1984) who investigated TEC in various regions.  
419 They concluded that the seasonal variation in TEC is attributed to the seasonal differences in  
420 thermospheric composition. Moreover, the sub-solar point is around the equator during the  
421 equinox. Consequently, the sun shines directly over the equatorial region, and in addition to the  
422 high ratio of O/N<sub>2</sub> around the region, this translates to stronger ionization, thus, semi-annual  
423 pattern is formed. Our finding is supported by Ross Skinner et al. (1966), Bolaji et al. (2012),  
424 and Scherliess and Fejer (1999) who obtained semi-annual variation in TEC. Scherliess and Fejer  
425 (1999) suggested that daytime  $E \times B$  drift velocities result to semi-annual variation because the  
426 drift velocities are more and less significant in the equinoctial months and June solstice,  
427 respectively.

428

## 429 **5.0 Conclusion**

430 An investigation into the quietest GPS-TEC, DPS-TEC, IRI-TEC, and NeQ-TEC over an  
431 equatorial station of Africa during just ascending phase cycle of low solar activity in the year  
432 2010 was carried out. Our findings indicate that the variations in GPS, DPS, IRI, and NeQ-TEC  
433 are solar zenith angle dependence, having maximum and minimum TEC during the noontime and  
434 pre-sunrise or sunrise minimum. We also found that the absence of daytime bite-out in the GPS-  
435 TEC is exaggerated in the DPS-TEC, IRI-TEC, and NeQ-TEC morphologies. Furthermore, our  
436 result reveals a faster sunrise increase in DPS-TEC, IRI-TEC, and NeQ-TEC than GPS-TEC that  
437 is attributed to the misinterpretation of the topside Ne profile of the DPS-TEC, IRI-TEC, and  
438 NeQ-TEC in order to incorporate the plasmaspheric electron content (PEC) into the models. The  
439 daytime DPS-TEC is also higher than the daytime GPS-TEC, IRI-TEC, and NeQ-TEC, except in  
440 April, September and December where daytime DPS-TEC and GPS-TEC values are close. The  
441 daytime GPS-TEC is also approximately equal the daytime IRI-TEC in April, July, August and  
442 September whereas in the daytime NeQ-TEC only June approximately close to the daytime GPS-  
443 TEC. The close values in daytime TEC obtained in DPS-TEC and IRI-TEC in some months may  
444 be unconnected to the improved model values in the absence or a little PEC contributions during  
445 the daytime. Another finding is the faster decay in DPS-TEC during the dusk time compared to  
446 GPS-TEC, IRI-TEC, and NeQ-TEC. However, the decline is approximately similar in value  
447 found in June, July and August (June solstice). The hourly variations of percentage difference  
448 between GPS-TEC and DPS-TEC, GPS-TEC and IRI-TEC and GPS-TEC and NeQ-TEC in all  
449 months revealed that the pre-sunrise values in DPS-TEC, IRI-TEC and NeQ-TEC require an  
450 attention. The daytime DPS-TEC value is closer to the GPS-TEC value compared to the daytime  
451 IRI-TEC and NeQ-TEC values. The nighttime NeQ-TEC and IRI-TEC perform better with  
452 GPS-TEC compared with DPS-TEC in all months. This study was carried out during the  
453 quietest period of the year 2010; it will be of advantage to investigate the similar work during the  
454 most disturbed days and compared with our results. Moreover, additional stations in the  
455 equatorial region will be needed to validate the latitudinal effect of the model with the observed  
456 parameters. This will reshape the model parameters for improved ionospheric modeling over  
457 Africa.

458  
459  
460

## 461 **6.0 References**

- 462
- 463 Adewale, A.O., Oyeyemi, E.O., and Olwendo, J. (2012): Solar activity dependence of total  
464 electron content derived from GPS observations over Mbarara. *Advances in Space*  
465 *Research*, **50**, 415– 426.
- 466 Akala, A.O., E O Oyeyemi, E O Somoye, A B Adeloye, and A.O., Adewale. 2010. Variability of  
467 foF2 in the African Equatorial Ionosphere. *Advances in Space Research* 45 (11). COSPAR:  
468 1311–14. doi:10.1016/j.asr.2010.01.003.
- 469 Andreeva, E. S., and M. V Lokota. 2013. Analysis of the Parameters of the Upper Atmosphere  
470 and Ionosphere Based on Radio Occultation, Ionosonde Measurements, IRI and NeQuick  
471 Model Data. *52(10):1820–26*. doi.org/10.1016/j.asr.2013.08.012.
- 472 Aravindan, P., and Iyer, K. N. (1990): Day-to-day variability in ionospheric electron content at  
473 low latitudes, *Pmet. Space Sci.*, **38(6)**,743-750.
- 474 Bagiya, Mala S, H.P Joshi, K N Iyer, M Aggarwal, S Ravindran, and B M Pathan. 2009. "TEC  
475 Variations during Low Solar Activity Period (2005-2007) near the Equatorial Ionospheric  
476 Anomaly Crest Region in India." *Annales Geophysicae* 27: 1047–57. doi:10.5194/angeo-  
477 27-1047-2009.
- 478 Balan, N., and Rao, P. B. (1984): Relationship Between Nighttime Total Electron Content  
479 Enhancements, *Journal of Geophysical Research*, **89(10)**, 9009-9013.
- 480 Balan, N., Iyer, K.N. Equatorial anomaly in ionospheric electron content and its relation to  
481 dynamo currents. *J. Geophys. Res.* 88 (A12), 10259– 10262, 1983.
- 482 Bandyopadhyay, P. (1970): Measurement of total electron content at Huancayo, Peru, *Planet.*  
483 *Space Sci.*, **18**, 129–135, doi:10.1016/0032-0633 (70)90150-9.
- 484 Belehaki, A Jankowski, N.Reinisch B. W. 2004. "Plasmaspheric Electron Content Derived from  
485 GPS TEC and Digisonde Ionograms." 33:833–37.
- 486 Belehaki, A Jankowski, N.Reinisch B. W. 2004. "Plasmaspheric Electron Content Derived from  
487 GPS TEC and Digisonde Ionograms." 33:833–37.
- 488 Belehaki, A., and Kersley, L. (2003): Statistical validation of the ITEC parameter, Third  
489 Workshop of the COST271 Action, 23-27 September 2003, Spetses, Greece.
- 490 Bent, R.B., Llewellyn, S.K. and Schmid, P.E., 1972. A highly successful empirical model for the  
491 worldwide ionospheric electron density profile. DBA Systems, Melbourne, Florida.
- 492 Bidaine, B. and R. Warnant. 2011. "Ionosphere Modelling for Galileo Single Frequency Users :  
493 Illustration of the Combination of the NeQuick Model and GNSS Data Ingestion."  
494 *Advances in Space Research* 47(2):312–22. doi.org/10.1016/j.asr.2010.09.001).
- 495 Bilitza, D. ( 2001): 'International Reference Ionosphere 2000', *Radio Science*, **36(2)**, 261-275.
- 496 Bilitza, D. (1986): International reference ionosphere: Recent developments, *Radio Science*, **21**,  
497 343-346.
- 498 Bilitza, D., and Rawer, K. (1998): "International Reference Ionosphere Model (IRI- 93,"  
499 <http://envnet.gsfc.nasa.gov/Models/EnviroNET-Models.html> *Adv. Space Res.*, **69**, 520–  
500 829.
- 501 Bolaji, O. S., Adeniyi, J. O., Radicella, S. M., and Doherty, P. H. (2012): Variability of total  
502 electron content over an equatorial West African station during low solar activity.  
503 *RADIO SCIENCE*, **47**, RS1001 doi:10.1029/2011RS004812.
- 504 Breed, A.M, G L Goodwin, A-m Vandenberg, E A Essex, K J W Lynn, and Abstract  
505 Ionospheric. 1997. Ionospheric Total Electron Content and Slab Thickness J . H . Silby 32  
506 (4): 1635–43. 10.1029/97RS00454 2006.



507 Carlson, H.C. Incoherent scatter radar mapping of polar electrodynamic. *J. Atmos. Solar-Terr.*  
508 *Phys.* 58 (1–4), 37–56, 1996.

509 Cherniak, Iurii and Irina Zakharenkova. 2016. NeQuick and IRI-Plas Model Performance on  
510 Topside Electron Content Representation: Spaceborne GPS Measurements. 1–15.

511 Ciraolo, L., and P. Spalla. 1997. “Comparison of Ionospheric Total Electron Content from Navy  
512 Navigation Satellite System and the GPS.” *Radio Science* 32 (3): 1071–1080.  
513 doi:10.1029/97RS00425.

514 Coisson, P., Radicella, S.M., Leitinger, R. and Nava, B., 2006. Topside electron density in IRI  
515 and NeQuick: features and limitations. *Advances in Space Research*, 37(5), pp.937-942.

516 Davies, K., Recent progress in satellite radio beacon studies with particular emphasis on the  
517 ATS-6 Radio Beacon Experiment, *Space Sci. Rev.*, 25, 357-430, 1980

518 Ezquer, R. G., Adler, N.O., Radicella, S.M., Gonzalez, M .M., and Manza, J . R. (1992): Total  
519 electron content obtained from ionogram data alone, *Radio Science*, **27**(3), 429-434.

520 Fox, M. W., and McNamara, L. F. (1988): Improved world-wide maps of monthly median  
521 foF2, *Journal of Atmospheric and Terrestrial Physics*, **50**, 1077-1086.

522 Huang, X., Reinisch, B.W. Vertical total electron content from ionograms in real time. *Radio*  
523 *Sci.* 36 (2), 335–342, 2001. Ionization Anomaly over Africa Using Data Ingestion.”  
524 60:1732–38.

525 Jee, G., Schunk, R.W. and Scherliess, L., 2005. On the sensitivity of total electron content (TEC)  
526 to upper atmospheric/ionospheric parameters. *Journal of atmospheric and solar-terrestrial*  
527 *physics*, 67(11), pp.1040-1052.

528 Jesus, R De, P R Fagundes, A Coster, O S Bolaji, J H A Sobral, I S Batista, AJ De Abreu, et al.  
529 2016. Effects of the Intense Geomagnetic Storm of September – October 2012 on the  
530 Equatorial, Low- and Mid-Latitude F Region in the American and African Sector during the  
531 Unusual 24th Solar Cycle." *Journal of Atmospheric and Solar-Terrestrial Physics* 138–139.  
532 Elsevier: 93–105. doi:10.1016/j.jastp.2015.12.015.

533 Jodogne J.-C., H. Nebdi, and R.Warnan. 2004. *Advances in Radio Science* GPS TEC and ITEC  
534 from Digisonde Data Compared with NEQUICK Model. 269–73.

535 Karia, S.P., and Pathak, K.N.(2011): GPS based Tec measurement for a period Aug 2008-Dec  
536 2009 near the northern crest of India equatorial ionospheric anomaly region. *Journal of*  
537 *earth system science*, **120.5**, 851-858.

538 Kenpankho, P., P. Supnithi, and T. Nagatsuma. 2013. ScienceDirect Comparison of Observed  
539 TEC Values with IRI-2007 TEC and IRI-2007 TEC with Optional Fo F2 Measurements  
540 Predictions at an Equatorial Region, Chumphon, Thailand. *Advances in Space Research*

541 Kenpankho, P., P. Supnithi, and T. Nagatsuma. 2013. ScienceDirect Comparison of Observed  
542 TEC Values with IRI-2007 TEC and IRI-2007 TEC with Optional Fo F2 Measurements  
543 Predictions at an Equatorial Region, Chumphon, Thailand. *Advances in Space Research*

544 Kumar, S., and Singh, A.K. (2009): Variation of ionospheric total electron content in Indian  
545 low latitude region of the equatorial anomaly during May 2007–April 2008, *Advances*  
546 *in Space Research* **43**, 1555–1562.

547 Langley, R., M. Fedrizzi, E. Paula, M. Santos, and A. Komjathy (2002), Mapping the low  
548 latitude ionosphere with GPS, *GPS World*, 13(2), 41-46.

549 Leong, S. K. et al. 2014. Assessment of Ionosphere Models at Banting: Performance of IRI-  
550 2007, IRI-2012, and NeQuick 2 Models during the Ascending Phase of Solar Cycle 24.  
551 *Advances in Space Research* (2013) <http://dx.doi.org/10.1016/j.asr.2014.01.026>.

552 Liu, J. Y., H. F. Tsai, and T. K. Jung (1996b), Total electron content obtained by using the global

553 positioning system, *Terr. Atmos. Oceanic Sci.*, 7, 107.

554 Mala, S., Bagiya, H. P., Joshi, K. N., Iyer, M., Aggarwal, S., Ravindran, and Pathan, B.M.

555 (2009): TEC variations during low solar activity period (2005–2007) near the equatorial

556 Ionospheric Anomaly Crest region in India, *Ann. Geophys.*, **27**, 1047–1057.

557 Mannucci, A. J., B. D. Wilson, and C. D. Edwards (1993), A new method for monitoring the

558 Earth's ionospheric total electron content using the GPS global network, paper

559 presented at ION GPS - 93, Inst. of Navigation., pp. 1323-1332, Salt Lake City, Utah,

560 22-24 Sept.

561 McKinnell, Lee-anne, Ben Opperman, and Pierre J. Cilliers. GPS TEC and Ionosonde TEC over

562 Grahamstown, South Africa: First Comparisons Lee-Anne McKinnell, Ben Opperman and

563 Pierre J. Cilliers. (April 1996).

564 McNamara, L.F (1985). The use of total electron content measurements to validate empirical

565 models of the ionosphere. *Adv. Space Res.* **5** (7), 81– 90.

566 Migoya Orué, Y. O., S. M. Radicella, P. Coisson, R. G. Ezquer, and B. Nava. 2008. Comparing

567 TOPEX TEC Measurements with IRI Predictions.” *Advances in Space Research* 42(4):757–

568 62.

569 Migoya-Orue, Y., O. Folarin-olufunmilayo, S. Radicella, K. Alazo-Cuartas, and A. B. Rabiú.

570 2017. “ScienceDirect Evaluation of NeQuick as a Model to Characterize the Equatorial

571 Mosert, M, L A McKinnell, M Gender, C Brunini, J Araujo, R G Ezquer, and M Cabrera. 2007.

572 "Variations of F O F 2 and GPS Total Electron Content over the Antarctic Sector," 327–33.

573 doi:10.5047/eps.2011.01.006.

574 Mosert, M. and D. Altadill. 2007. "Comparisons of IRI TEC Predictions with GPS and

575 Digisonde Measurements at the Ebro." 39:841–47.

576 Nava, B. and S. M. Radicella. 2009. “On the Use of NeQuick Topside Option in IRI-2007.”

577 43:1688–93.

578 Obrou, O.K., Mene, M.N., Koba, A.T., and Zaka, K.Z. (2008): Equatorial total electron content

579 (TEC) at low and high solar activity, *Advances in Space Research* **43**, 1757–1761.

580 Okoh, D., McKinnell, L.A., Cilliers, P., Okere, B., Okonkwo, C. and Rabiú, B., 2015. IRI-vTEC

581 versus GPS-vTEC for Nigerian SCINDA GPS stations. *Advances in Space Research*, 55(8),

582 pp.1941-1947.

583 Olatunji, E. O. (1967): The total columnar electron content of the equatorial ionosphere,

584 Olwendo, O. J., P. Baki, P. J. Cilliers, C. Mito, and P. Doherty. 2013. “Comparison of GPS TEC

585 Variations with IRI-2007 TEC Prediction at Equatorial Latitudes during a Low Solar

586 Activity (2009-2011) Phase over the Kenyan Region.” *Advances in Space Research* 52(10).

587 Olwendo, O. J., P. Baki, P. J. Cilliers, C. Mito, and P. Doherty. 2012. “Comparison of GPS TEC

588 Measurements with IRI-2007 TEC Prediction over the Kenyan Region during the

589 Descending Phase of Solar Cycle 23.” *Advances in Space Research* 49(5):914–21.

590 Retrieved (<http://dx.doi.org/10.1016/j.asr.2011.12.007>).

591 Olwendo, O. J., P. Baki, P. J. Cilliers, C. Mito, and P. Doherty. 2013. “Comparison of GPS TEC

592 Variations with IRI-2007 TEC Prediction at Equatorial Latitudes during a Low Solar

593 Activity (2009-2011) Phase over the Kenyan Region.” *Advances in Space Research* 52(10).

594 Olwendo, O.J., Baki, P., Cilliers, P.J., Mito, C., and Doherty, P. (2012): Comparison of GPS

595 TEC measurements with IRI-2007 TEC prediction over the Kenyan region during the

596 descending phase of solar cycle 23, *Advances in Space Research* **49**, 914–921.

597 Rabiú, A. B., A. O. Adewale, R. B. Abdulrahim, and E. O. Oyeyemi. 2014. “ScienceDirect TEC

598 Derived from Some GPS Stations in Nigeria and Comparison with the IRI and NeQuick

599 Models.” *Advances in Space Research* 53(9):1290–1303. Retrieved  
600 (<http://dx.doi.org/10.1016/j.asr.2014.02.009>).

601 Radicella, S.M., Bilitza, D., Reinisch, B.W., and Adeniyi, J.O., Mosert Gonzalez, M.E., Zolesi,  
602 B., Zhang, M.L., Zhang, S. (1998): IRI Task Force Activity At ICTP: Proposed  
603 Improvements For The IRI Region Below The F Peak, *Adv. Space Res.* 22(6) 731-739.

604 Rama Rao, P.V.S., Gopi Krishna, S., Niranjana, K., Prasad, D.S.V.V.D. Temporal and spatial  
605 variations in TEC using simultaneous measurements from the Indian GPS network of  
606 receivers during the low solar activity period of 2004–2005. *Ann. Geophys.* 24, 3279–  
607 3292, 2006b.

608 Rama Rao, P.V.S., Niranjana, K., Prasad, D.S.V.V.D., Gopi Krishna, S., Uma, G. On the validity  
609 of the ionospheric pierce point (IPP) altitude of 350 km in the equatorial and low latitude  
610 sector. *Ann. Geophys.* 24, 2159–2168, 2006a.

611 Rastogi, R G., and Sharma, R. P. (1971): Ionospheric electron content at Ahmedabad (near the  
612 crest of the equatorial anomaly) by using beacon satellite transmissions during half a  
613 solar cycle; *Planet. Space Sci.* 19 1505–1517.

614 Rastogi, R.G., Iyer, K.N. and Bhattacharyya, J.C., 1975. Total electron content of the ionosphere  
615 over the magnetic equator. *Current Science*, pp.531-533.

616 Rawer, K. and Bilitza, D., 1990. International Reference Ionosphere—plasma densities: status  
617 1988. *Advances in space research*, 10(8), pp.5-14

618 Rawer, K., Lincoln, J. V., and Conkright, R. O. (1981): International Reference Ionosphere—  
619 IRI 79, World Data Center A for Solar-Terrestrial Physics, Report UAG-82, Boulder,  
620 Colorado. 52. 223-232.

621 Reinisch, B.W., Huang, X. Deducing topside profile and total electron content from bottomside  
622 ionograms. *Adv. Space Res.* 27 (1), 23–30, 2001.

623 Rios, V.H., Medina, C.F. and Alvarez, P., 2007. Comparison between IRI predictions and  
624 digisonde measurements at Tucuman. *Journal of Atmospheric and Solar-Terrestrial Physics*,  
625 69(4-5), pp.569-577.

626 Rush, C., Fox, M., Bilitza, D., Davies, K., McNamara, L., Stewart, F., and PoKempner, M.  
627 (1989): Ionospheric mapping: an update of foF2 coefficients, *Telecomm. J.* 56, 179 182.

628 Skinner, N. J. (1966): Measurements Of Total Electron Content Near The Magnetic Equator,  
629 *Planet. Space Sci.* Vol. 14, Pp. 1123 - 1129.

630 Tan, A, and Newberry College. 1982. “On the Nighttime Increase of” 44.

631 Tariku, Yekoye. 2015. “Patterns of GPS-TEC Variation over Low-Latitude Regions (African  
632 Sector) during the Deep Solar Minimum (2008 to 2009) and Solar Maximum (2012 to  
633 2013) Phases.” *Earth, Planets, and Space* 67 (1). doi:10.1186/s40623-015-0206-2.

634 Tyagi, T. R., Yeh, K. C., and Tauriainen, A. (1982): The Electron Content and Its Variations at  
635 Natal, Brazil, *Journal of Geophysical Research*, 87(A4), 2525-2532.

636 Wu C-C, Liou K., Shan, S. J., and Tseng, C. L. (2008): Variation of ionospheric total electron  
637 content in Taiwan region of the equatorial anomaly from 1994 to 2003, *Advances in*  
638 *Space Research* 41, 611–616.

639 Young, D. M. L., Yuf, P. C., and Roelofs, T.H.(1970): Anomalous nighttime increases in total  
640 electron content, *Planet. Space Sci.* 18,1163-1179.

641 Yu, Xiao, Chengli Shi, Dun Liu, and Weimin Zhen. 2012. "A Preliminary Study of the NeQuick  
642 Model over China Using GPS TEC and Ionosonde Data." 2012 10th International  
643 Symposium on Antennas, Propagation and EM Theory, ISAPE 2012 (36):627–30.

644 Zh, A. G.Noordwijk, Campus Nord, Mod C-, and Jordi Girona 2014. “NeQuick Model,

645 GALILEO, Slant TEC, Modified Dip, Effective Ionisation Level.” (2).  
 646 Zhang, Man Lian, Sandro M. Radicella, Jian Kui Shi, Xiao Wang, and Shun Zhi Wu. 2006.  
 647 “Comparison among IRI, GPS-IGS and Ionogram-Derived Total Electron Contents.”  
 648 Advances in Space Research 37(5):972–77.  
 649

650  
 651 **7.0 Figures**  
 652

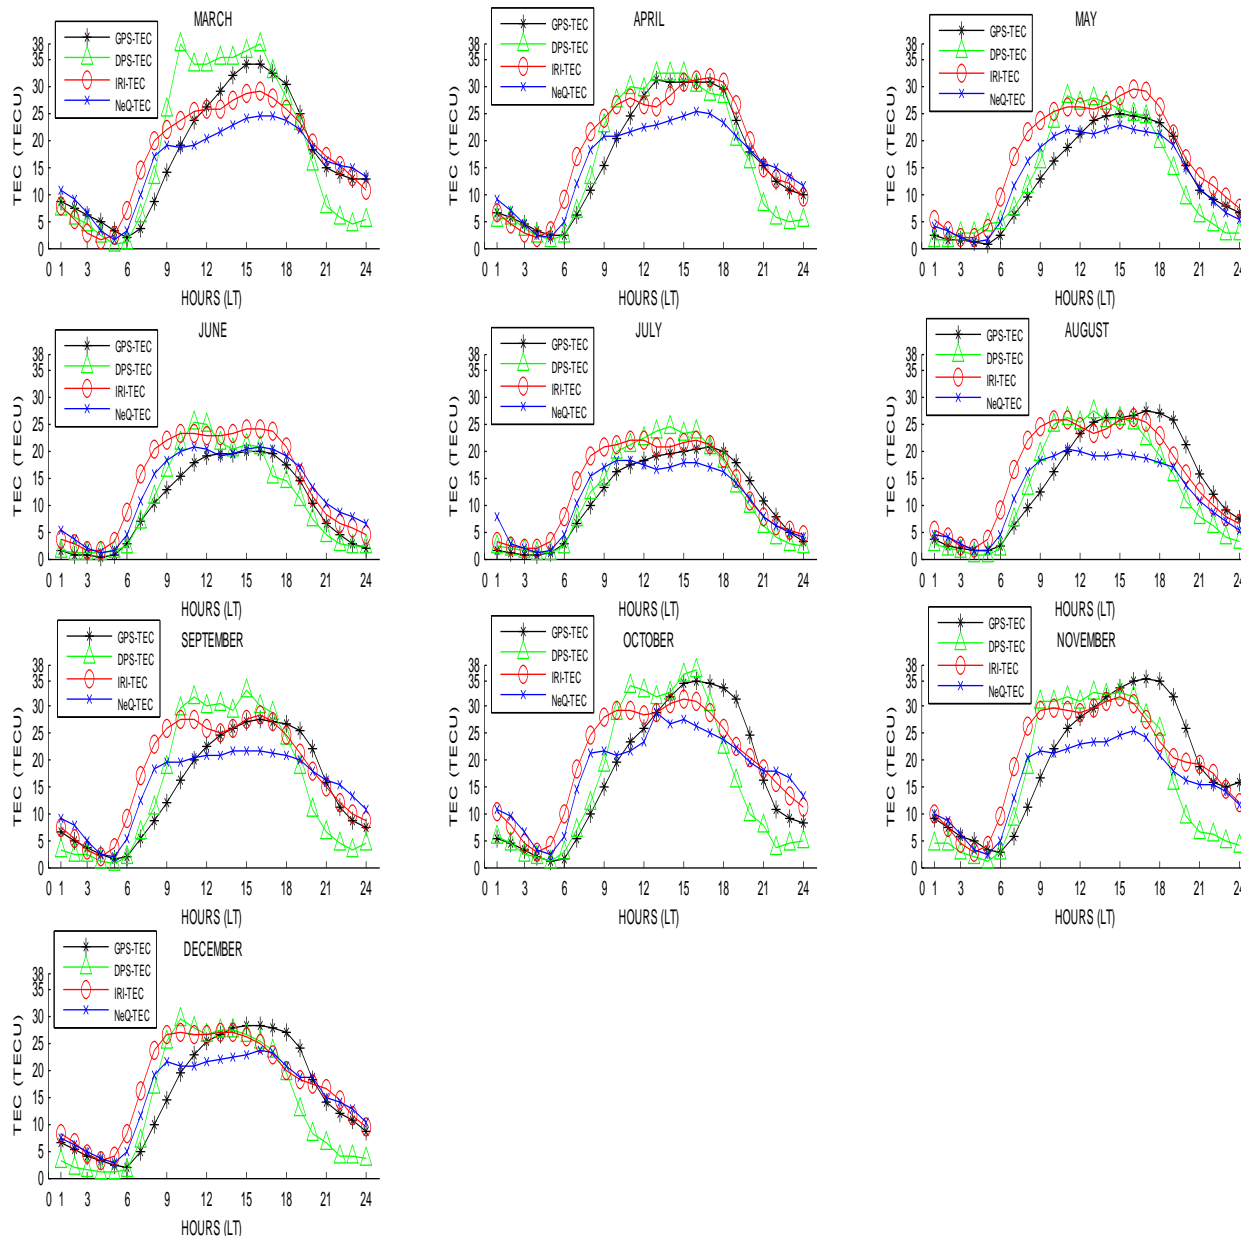

653  
 654 Figure1. The hourly variations of the monthly median of GPS, DPS, IRI, and NeQuick TEC in  
 655 March-December during quiet period.

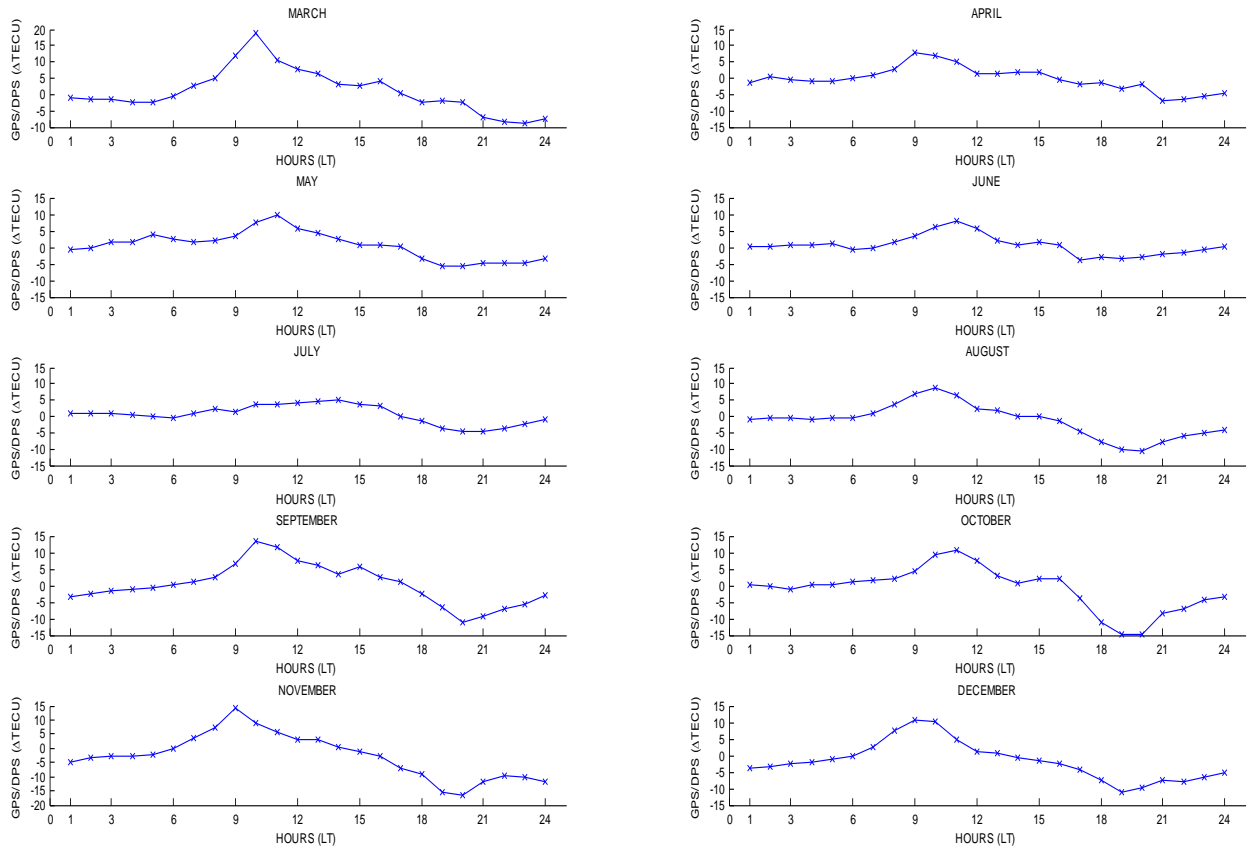

656  
 657 Figure 2a. The hourly  $\Delta$ TEC variations between the GPS-TEC and DPS-TEC from March -  
 658 December during quiet period.  
 659

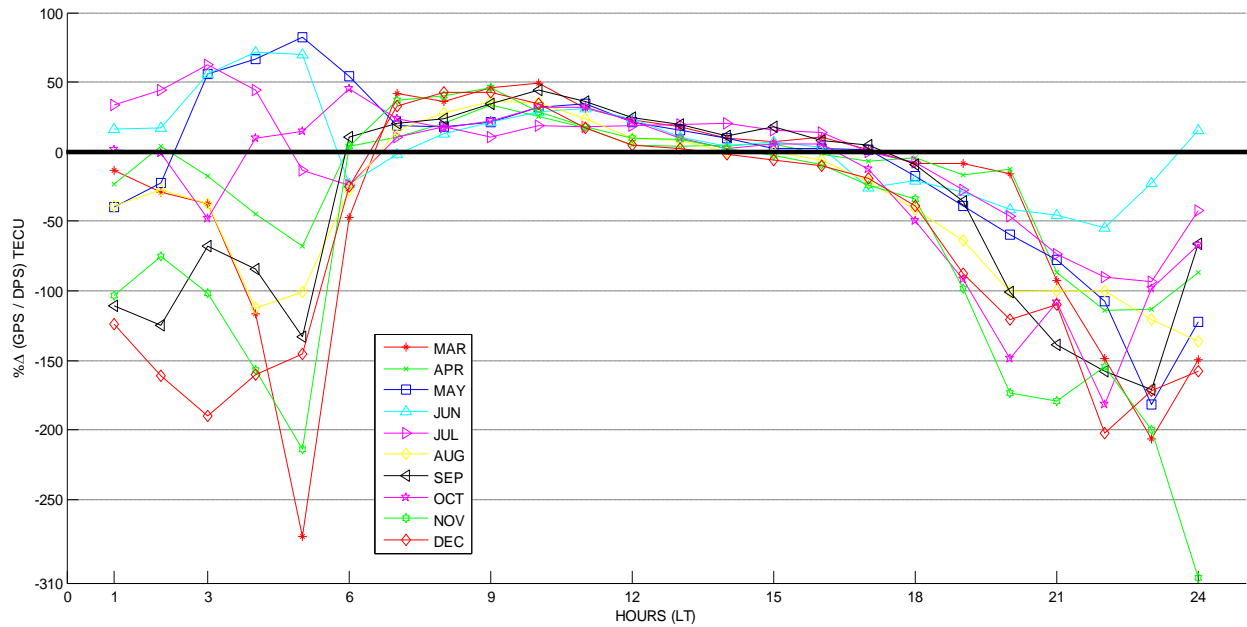

660  
 661 Figure 2b. The mass plot of the hourly  $\% \Delta$  TEC variations between the GPS-TEC and DPS-TEC  
 662 from March - December during quiet period.  
 663

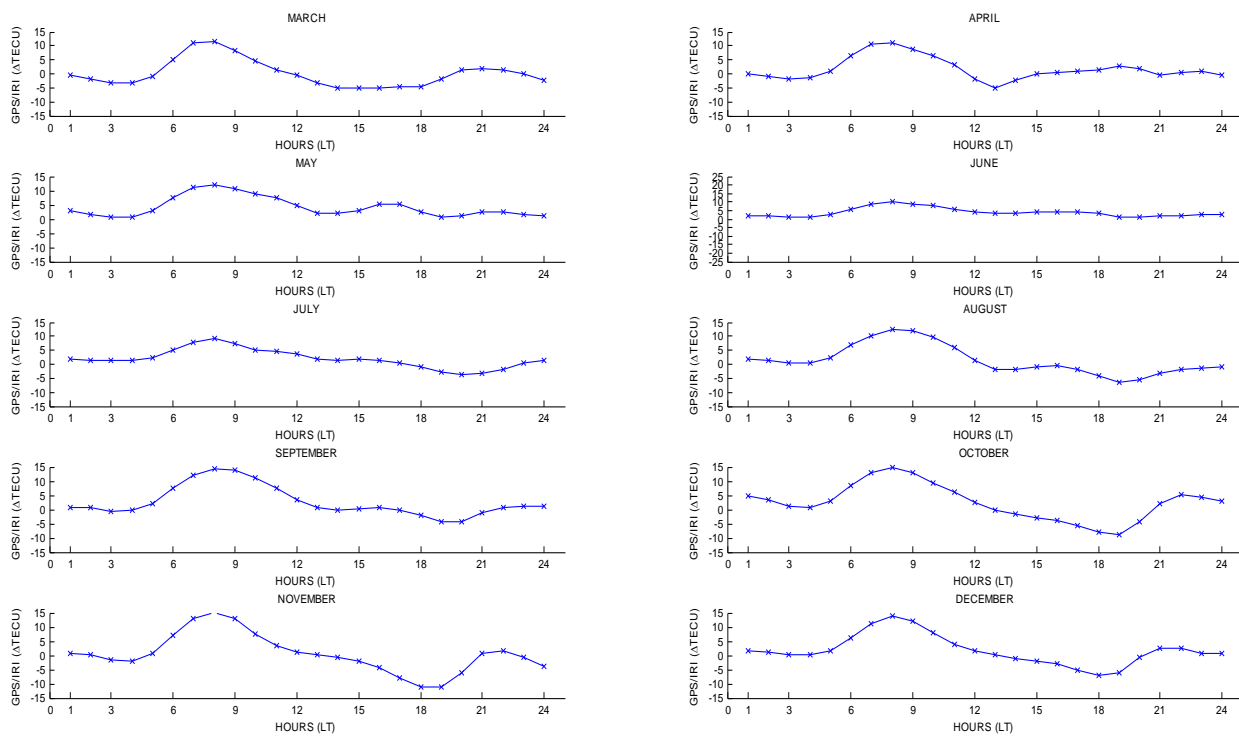

665  
666  
667

Figure 3a. The hourly  $\Delta$ TEC variations between the GPS-TEC and IRI-TEC from March - December during quiet period.

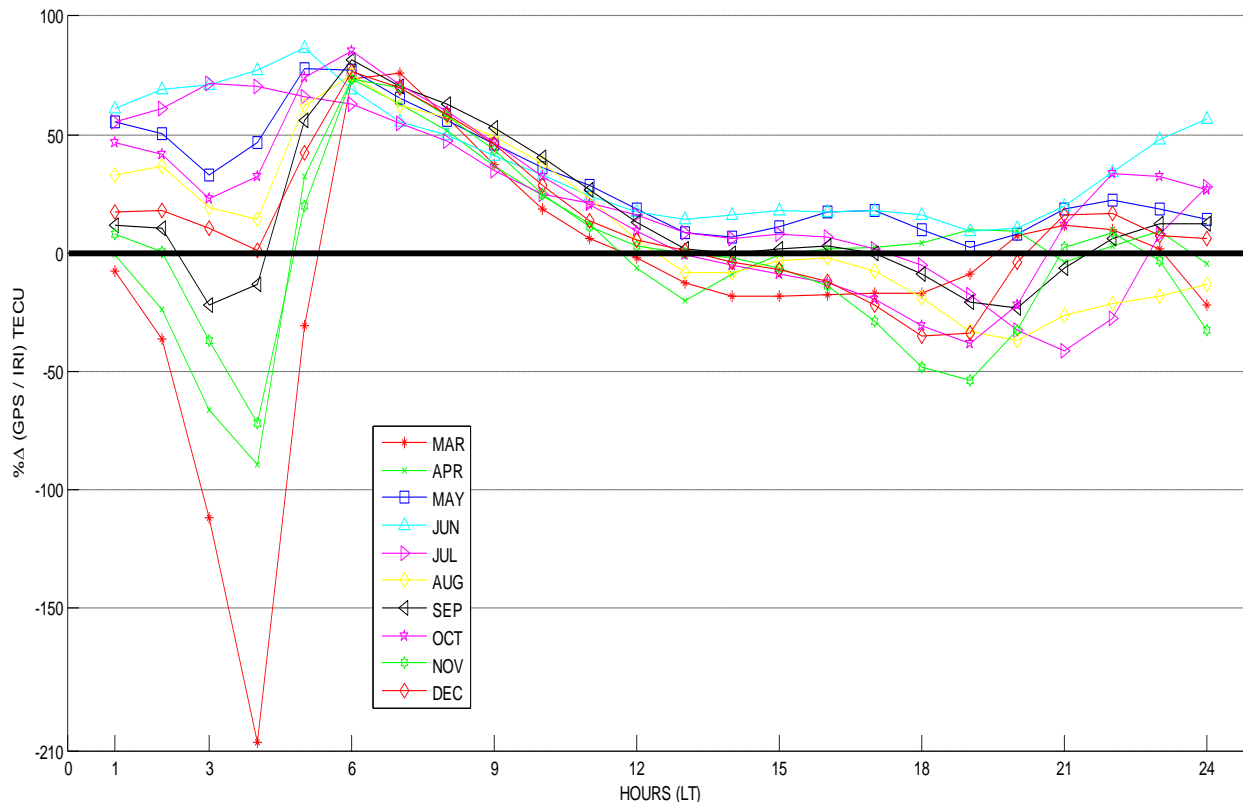

668  
669  
670

Figure 3b. The mass plot of the hourly  $\% \Delta$  TEC variations between the GPS-TEC and IRI-TEC from March to December during quiet period.

671  
672  
673  
674

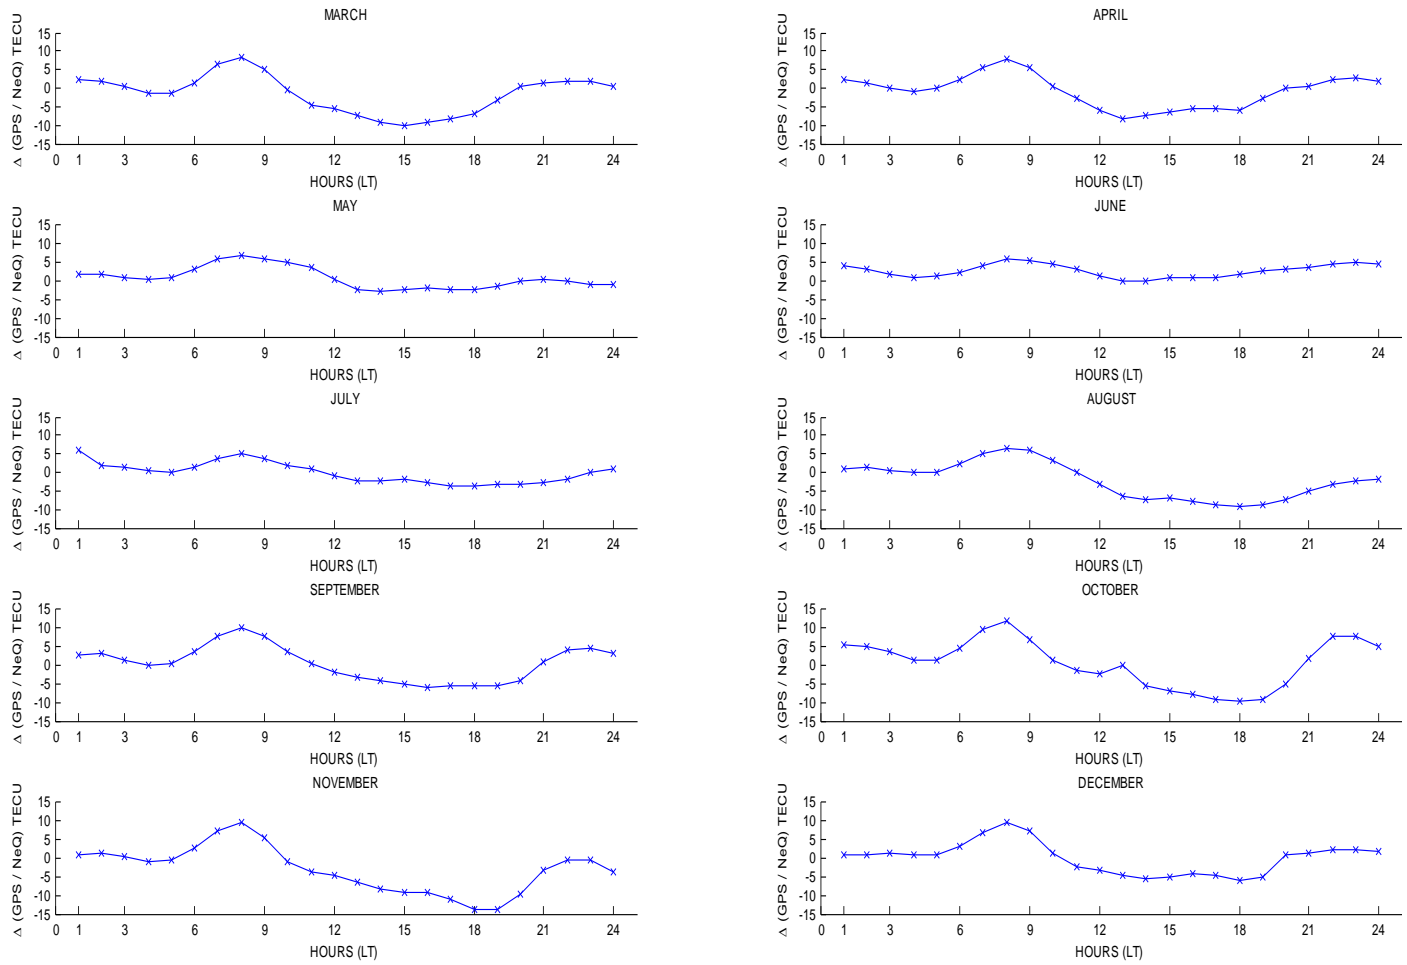

675  
676  
677  
678  
679

Figure 4a. The hourly  $\Delta$ TEC variations between the GPS-TEC and NeQ-TEC from March - December during quiet period.

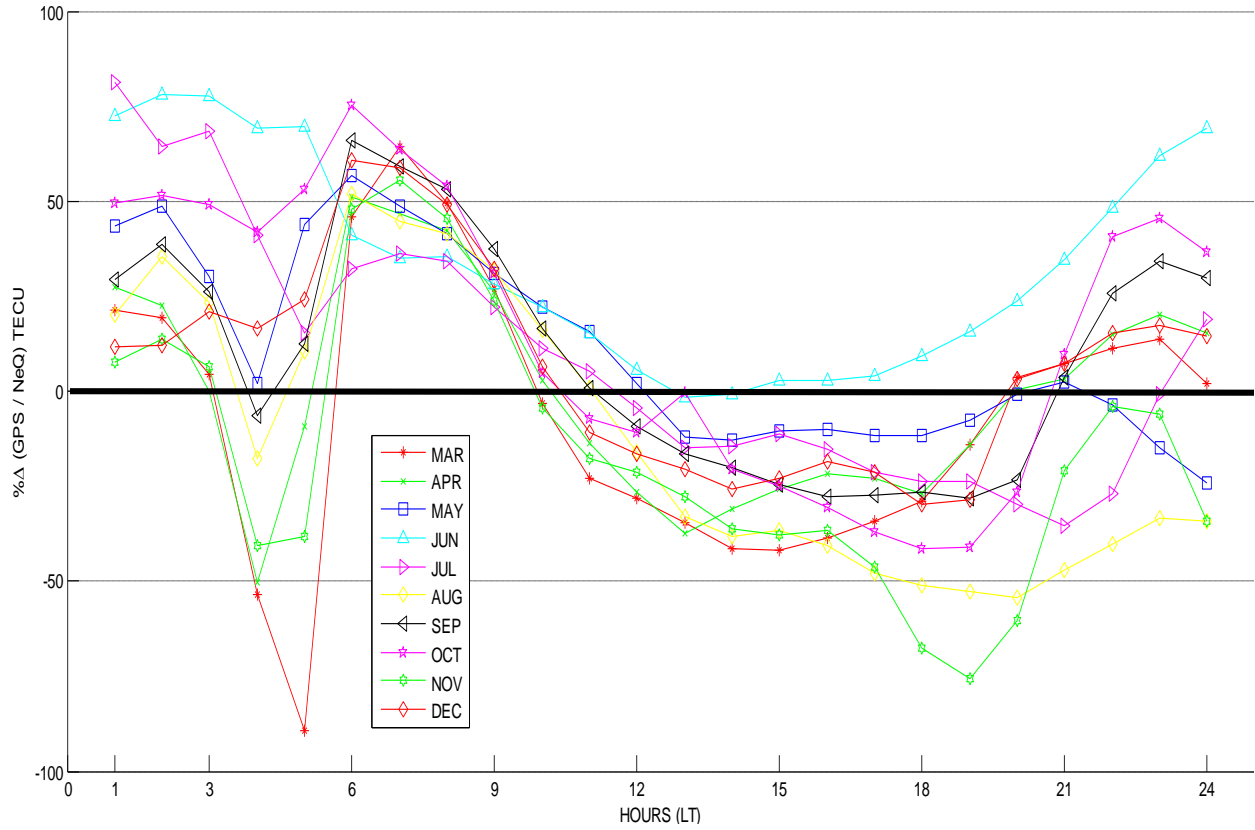

680  
 681  
 682  
 683  
 684  
 685  
 686

Figure 4b. The mass plot of the hourly %  $\Delta$  TEC variations between the GPS-TEC and NeQ-TEC from March - December during quiet period



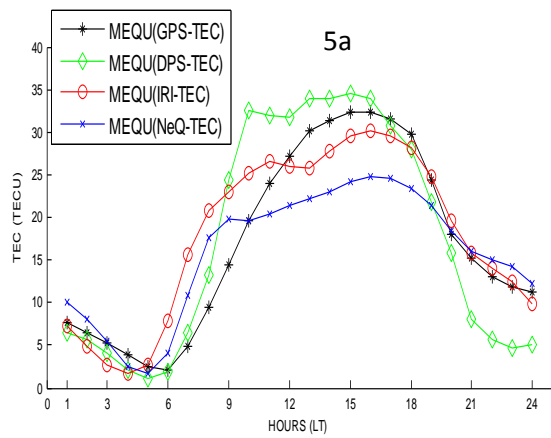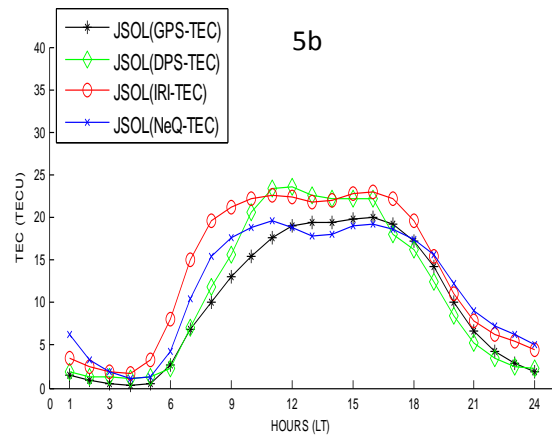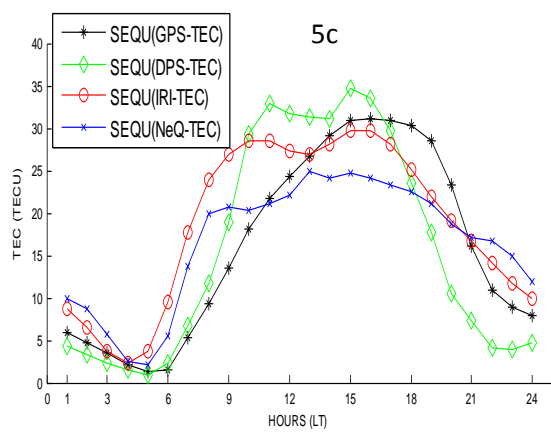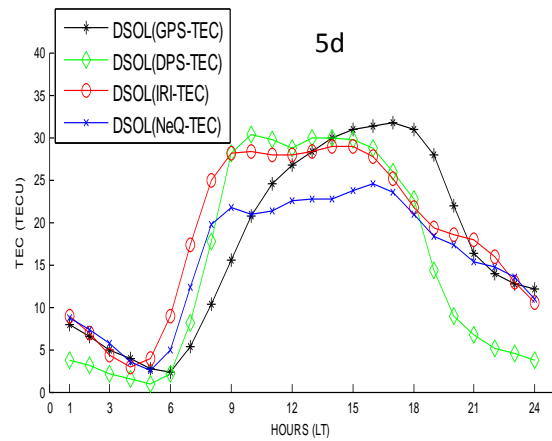

687 Figure 5a. The hourly variations of median GPS-TEC, DPS-TEC, IRI-TEC, and NeQ-TEC for  
 688 March equinox during quiet period.

690 Figure 5b. The hourly variations of median GPS-TEC, DPS-TEC, IRI-TEC, and NeQ-TEC for  
 691 June solstice during quiet period.

692 Figure 5c. The hourly variations of median GPS-TEC, DPS-TEC, IRI-TEC, and NeQ-TEC for  
 693 September equinox during quiet period.

694 Figure 5c. The hourly variations of median GPS-TEC, DPS-TEC, IRI-TEC, and NeQ-TEC for  
 695 December solstice during quiet period.

696
